# Supplementary material
Source: Springer Nature journal article supplement (https://www.springermedizin.de/resource/supplementary/12889_2013_6139_MOESM2_ESM.docx/9499138)
Supplement: MOESM2 [file 9499138]

**Table 1 Caries status according to variables studied**

| Variable (N) | DMFT>0 (n, %) | p-value |
| --- | --- | --- |
| Children examined (600) | 21% |  |
| Gender (600)  Girls (284)  Boys (316) | 73, 26%  51,16% | 0.004 |
| Place of birth (577)  Hong Kong (491)  Not in Hong Kong (86) | 95, 19%  22, 26% | 0.185 |
| Frequency of soft drinks (600)  At least once every two days (120)  Less than once every two days (480) | 34, 28%  90, 19% | 0.020 |
| Frequency of citric tea / drinks containing lemon (600)  At least once every two days (113)  Less than once every two days (487) | 19, 17%  105, 22% | 0.262 |
| Frequency of fruit juice (600)  At least once every two days (115)  Less than once every two days (485) | 27, 24%  97, 20% | 0.408 |
| Frequency of chewing gum (600)  At least once every two days (70)  Less than once every two days (530) | 15, 21%  109, 21% | 0.867 |
| Frequency of Vitamin C supplement drinks (600)  At least once every two days (82)  Less than once every two days (518) | 29, 35%  95, 18% | <0.001 |
| Frequency of toothbrushing (600)  At least once a day (144)  Twice or more (456) | 34, 24%  90, 20% | 0.317 |
| Care taker (598)  Parents (501)  Others (97) | 109, 22%  15, 16% | 0.162 |
| Education of father (573)  Primary or below (61)  Secondary (395)  Tertiary or above (117) | 16, 26%  83, 21%  23, 20% | 0.579 |
| Education of mother (585)  Primary or below (64)  Secondary (434)  Tertiary or above (87) | 15, 23%  89, 21%  19, 22% | 0.848 |
| Parent’ dental knowledge (600)  Low (53)  Middle (534)  High (13) | 9, 17%  111, 21%  4, 31% | 0.534 |
| Erosion experience (600)  No (150)  Yes (450) | 27, 18%  97, 22% | 0.352 |
